# Supplementary material for: Specific Autoantibodies and Clinical Phenotypes Correlate with the Aberrant Expression of Immune-Related MicroRNAs in Dermatomyositis
Source: Hindawi journal article supplement (doi:10.1155/2019/2927061), 2019-02-19
Supplement: f1 [file 2927061.f1.pdf]

Supplemenatry Table1 Clinical features of the DM patients

|                                      | ALL                  |
|--------------------------------------|----------------------|
| Number of patients, n                | 23                   |
| Age at onset, mean $\pm$ SD (years)  | 45.65 $\pm$ 13.94    |
| Sex ( F/M)                           | 19/4                 |
| Disease duration, mean of IQR months | 63 (5–36)            |
| Serological features                 |                      |
| CRP, mg/dl                           | 0.38 $\pm$ 0.38      |
| ESR, mm/h                            | 17.82 $\pm$ 17.22    |
| CK, U/L                              | 386.18 $\pm$ 808.09  |
| LDH, U/L                             | 323.27 $\pm$ 174.88  |
| Ferritin, ng/ml                      | 466.95 $\pm$ 1468.87 |
| Anti-Jo-1 antibody, n (%)            | 4(17.3%)             |
| Anti-MDA5 antibody, n (%)            | 5(21.7%)             |
| Anti-TIF1 $\gamma$ antibody, n (%)   | 1(4.3%)              |
| Anti-NXP2 antibody, n(%)             | 6(26%)               |
| Anti-PL-7 antibody, n(%)             | 1(4.3%)              |
| Anti-PL-12 antibody, n(%)            | 0                    |
| Anti-OJ antibody, n(%)               | 0                    |
| Anti-EJ antibody, n(%)               | 0                    |
| Anti-SAE antibody, n(%)              | 0                    |
| Anti-Mi2 antibody, n(%)              | 1(4.3%)              |
| Anti-SRP antibody, n(%)              | 0                    |
| HMGCR antibody, n(%)                 | 0                    |
| MSA negative, n(%)                   | 5(21.7%)             |
| Number of ILD, n(%)                  | 11(47.8%)            |

Average values or numbers of each group are shown. Standard deviation (SD), interquartile range (IQR) or percentages are shown in table. DM: dermatomyositis; CRP: C-reactive protein; ESR: erythrocyte sedimentation rate; CK: creatine kinase; LDH:lactate dehydrogenase; ILD: interstitial lung disease.
